# Supplementary material for: Reciprocal Tripartite Interactions between the Aedes aegypti Midgut Microbiota, Innate Immune System and Dengue Virus Influences Vector Competence
Source: PLoS Negl Trop Dis. 2012 Mar 6;6(3):e1561. doi: 10.1371/journal.pntd.0001561 (PMC3295821; doi:10.1371/journal.pntd.0001561)
Supplement: Table S1 — PCR primers used in gene expression analyses. (PDF) [file pntd.0001561.s003.pdf]

| Gene/Transcript ID | Primer name          | Sequence                     |
|--------------------|----------------------|------------------------------|
| AAEL003389         | Attacin Forward      | 5'-TTGGCAGGCACGGAATGTCTTG-3' |
|                    | Attacin Reverse      | 5'-TGTTGTCGGGACCGGGAAGTG-3'  |
| AAEL009496         | Ribosomal S7 Forward | 5'-GGGACAAATCGGCCAGGCTATC-3' |
|                    | Ribosomal S7 Reverse | 5'-TCGTGGACGCTTCTGCTTGTTG-3' |
| AAEL004522         | Gambicin Forward     | 5'-GCCAAAACCTGTTCTCTTG-3'    |
|                    | Gambicin Reverse     | 5'-CGATGTAGCATTCCGGTGATG-3'  |
| AAEL015515         | Cecropin-G Forward   | 5'-CCAAGCCTTGTGAACCAGTA-3'   |
|                    | Cecropin-G Reverse   | 5'-GGCCACCTGCTTCAGACT-3'     |
| AAEL000611         | Cecropin-E Forward   | 5'-CGAAGCCGGTGGTCTGAAG-3'    |
|                    | Cecropin-E Reverse   | 5'-ACTACGGGAAGTGCTTTCTCA-3'  |
| AAEL015404         | Lysozyme C Forward   | 5'-CCACGGCAACTGGATATGTCT-3'  |
|                    | Lysozyme C Reverse   | 5'-TCTGCGTCACCTTGGTGGTAT-3'  |
