# Supplementary material for: Reciprocal Tripartite Interactions between the Aedes aegypti Midgut Microbiota, Innate Immune System and Dengue Virus Influences Vector Competence
Source: PLoS Negl Trop Dis. 2012 Mar 6;6(3):e1561. doi: 10.1371/journal.pntd.0001561 (PMC3295821; doi:10.1371/journal.pntd.0001561)
Supplement: Table S2 — PCR primers used to amplify gene segments for the production of dsRNA segments. (PDF) [file pntd.0001561.s004.pdf]

| Gene/Transcript ID | Primer name | Sequence                                 |
|--------------------|-------------|------------------------------------------|
| AAEL015404         | dsLysC-F    | TAATACGACTCACTATAGGGACATTCAGCGAAGCCAAAGT |
|                    | dsLysC-R    | TAATACGACTCACTATAGGGAAATGTTGGGCAGTTCCTTG |
| AAEL015515         | dsCecG-F    | TAATACGACTCACTATAGGGTCCAAGCCTTGTGAACCAGT |
|                    | dsCecG-R    | TAATACGACTCACTATAGGGTTAGCCCCAGCTACAACAGG |
